# Supplementary material for: Corticostriatal control of defense behavior in mice induced by auditory looming cues
Source: PubMed Central journal article supplement (PMC7884702; doi:10.1038/s41467-021-21248-7), 2021-02-15
Supplement: 41467_2021_21248_MOESM1_ESM.pdf [file 41467_2021_21248_MOESM1_ESM.pdf]

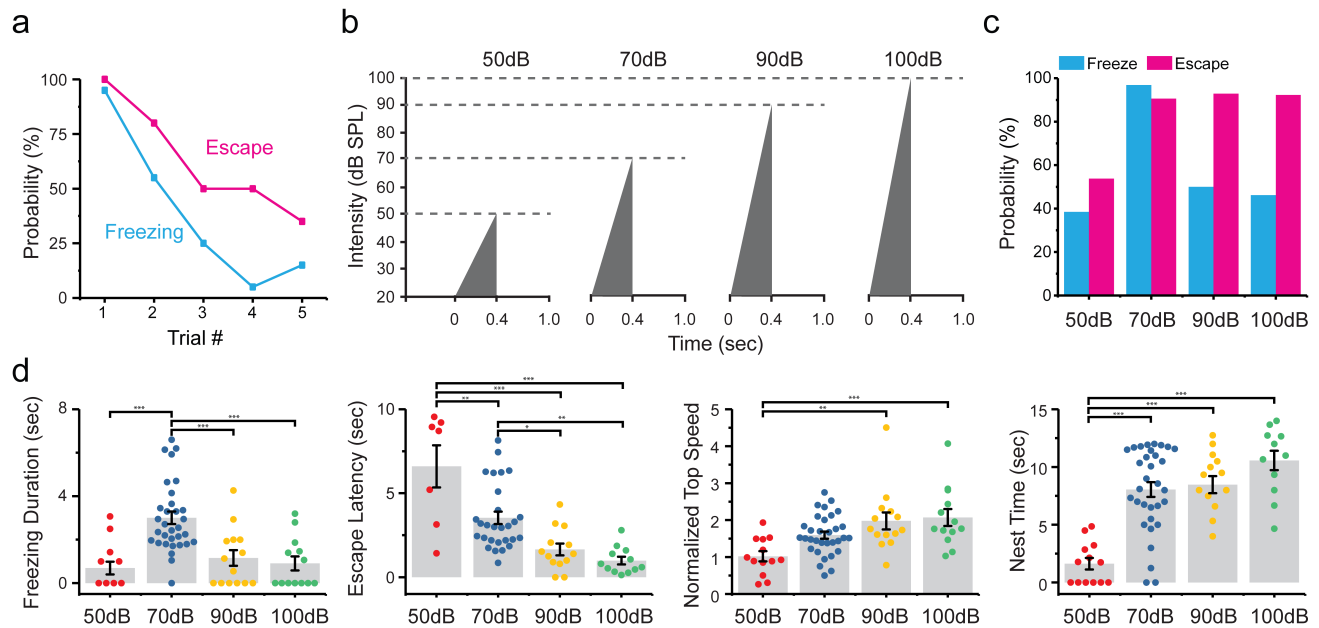

**Supplementary Fig. 1. Impact of sound intensity on induced behaviors.** **a**, Probability of animal exhibiting freezing (blue) or escape (red) behavior over 5 consecutive trials. **b**, Illustration of crescendo stimuli with different top intensities. **c**, Probability of freezing (blue) and escape (red) induced by crescendo stimuli of different top intensities (from left to right:  $n = 13, 32, 14$  and  $13$  mice, respectively). **d**, Comparison of freezing duration, escape latency, normalized top speed and nest time between crescendo of different top intensities. Freezing duration,  $n = 13, 32, 14, 13$ ; 50dB vs. 70dB,  $***p = 2.606 \times 10^{-5}$ ; 70dB vs. 90dB,  $***p = 7.202 \times 10^{-4}$ ; 70dB vs. 100dB,  $***p = 1.498 \times 10^{-4}$ . Escape latency,  $n = 7, 28, 13, 12$ ; 50dB vs. 70dB,  $**p = 0.002$ ; 50dB vs. 90dB,  $***p = 3.250 \times 10^{-6}$ ; 50dB vs. 100dB,  $***p = 2.675 \times 10^{-7}$ ; 70dB vs. 90dB,  $*p = 0.024$ ; 70dB vs. 100dB,  $**p = 0.001$ . Normalized top speed,  $n = 13, 32, 14, 13$ ; 50dB vs. 90dB,  $**p = 0.002$ ; 50dB vs. 100dB,  $***p = 8.273 \times 10^{-4}$ . Nest time,  $n = 13, 32, 14, 13$ ; 50dB vs. 70dB,  $***p = 1.413 \times 10^{-7}$ ; 50dB vs. 90dB,  $***p = 1.409 \times 10^{-6}$ ; 50dB vs. 100dB,  $***p = 1.808 \times 10^{-9}$ . One-way ANOVA with post hoc (Bonferroni) test.

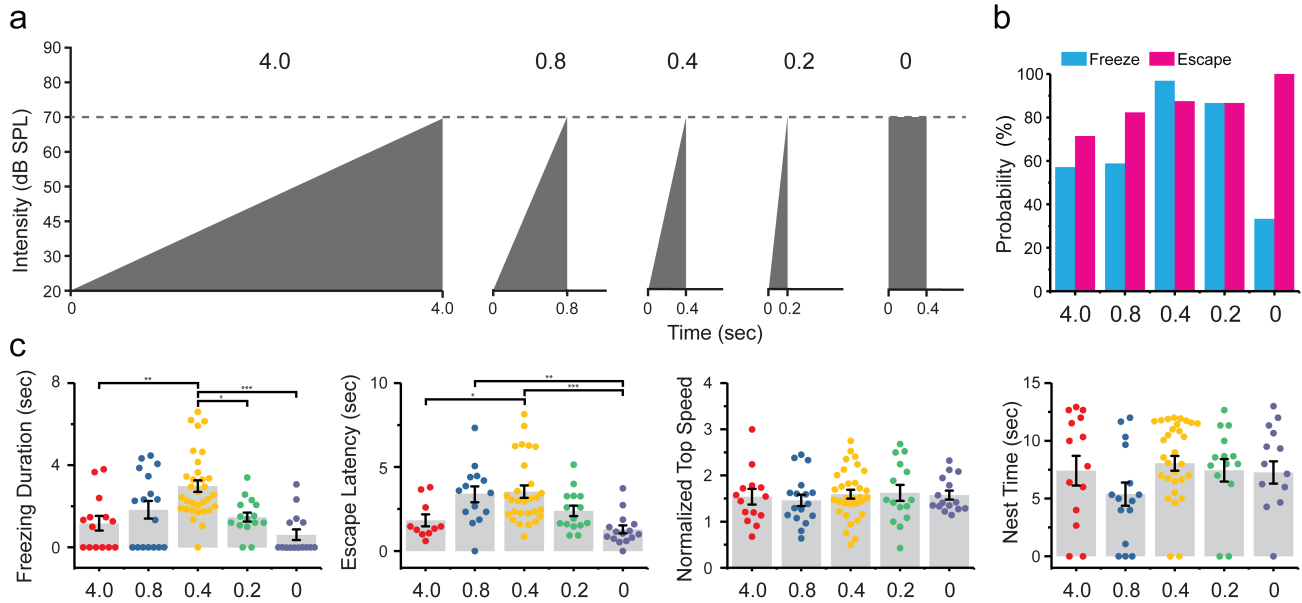

**Supplementary Fig. 2. Impact of rise time on induced behaviors.** **a**, Illustration of crescendo stimuli with different rise times. **b**, Probability of freezing (blue) and escape (red) induced by crescendo stimuli of different rise times (from left to right:  $n = 14, 17, 32, 15$  and  $15$  mice, respectively). **c**, Comparison of freezing duration, escape latency, normalized top speed and nest time between crescendo of different rise times. Freezing duration,  $n = 14, 17, 32, 15, 15$ ; 4.0s vs. 0.4s,  $**p = 0.001$ ; 0.4s vs. 0.2s,  $*p = 0.013$ ; 0.4s vs 0s,  $***P = 7.713 \times 10^{-6}$ . Escape latency,  $n = 14, 14, 28, 13, 15$ ; 4.0s vs 0.4s,  $*p = 0.042$ ; 0.8s vs. 0s,  $**p = 0.006$ ; 0.4s vs. 0s,  $***p = 2.701 \times 10^{-4}$ . Normalized top speed,  $n = 14, 17, 32, 15, 15$ . Nest time,  $n = 14, 17, 32, 15, 15$ . One-way ANOVA with post hoc (Bonferroni) test.

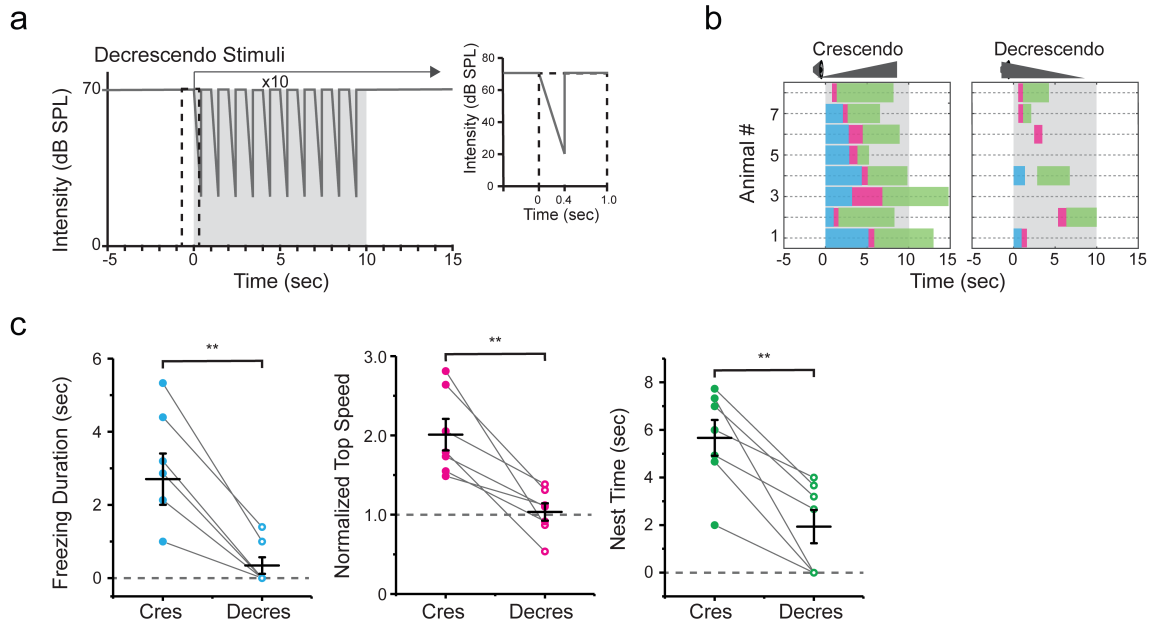

**Supplementary Fig. 3. Decrescendo stimuli with high-level background fail to induce defense behaviors.** **a**, Illustration of decrescendo stimuli with 70 dB background. Right, one individual stimulus. **b**, Comparison of behavioral responses to crescendo and decrescendo stimuli in the same animals ( $n = 8$  mice). **c**, Comparison of freezing duration (left,  $**p = 0.002$ , two-sided paired  $t$  test,  $t = 4.667$ ), normalized top speed (middle,  $**p = 0.001$ , two-sided paired  $t$  test,  $t = 4.580$ ) and nest time (right,  $**p = 0.006$ , two-sided paired  $t$  test,  $t = 3.315$ ) induced by crescendo (Cres.) and decrescendo (Decres.) stimuli in the same animals ( $n = 8$  mice). Data are presented as mean  $\pm$  s.e.m. The center presents the mean value and the bar represents s.e.m.

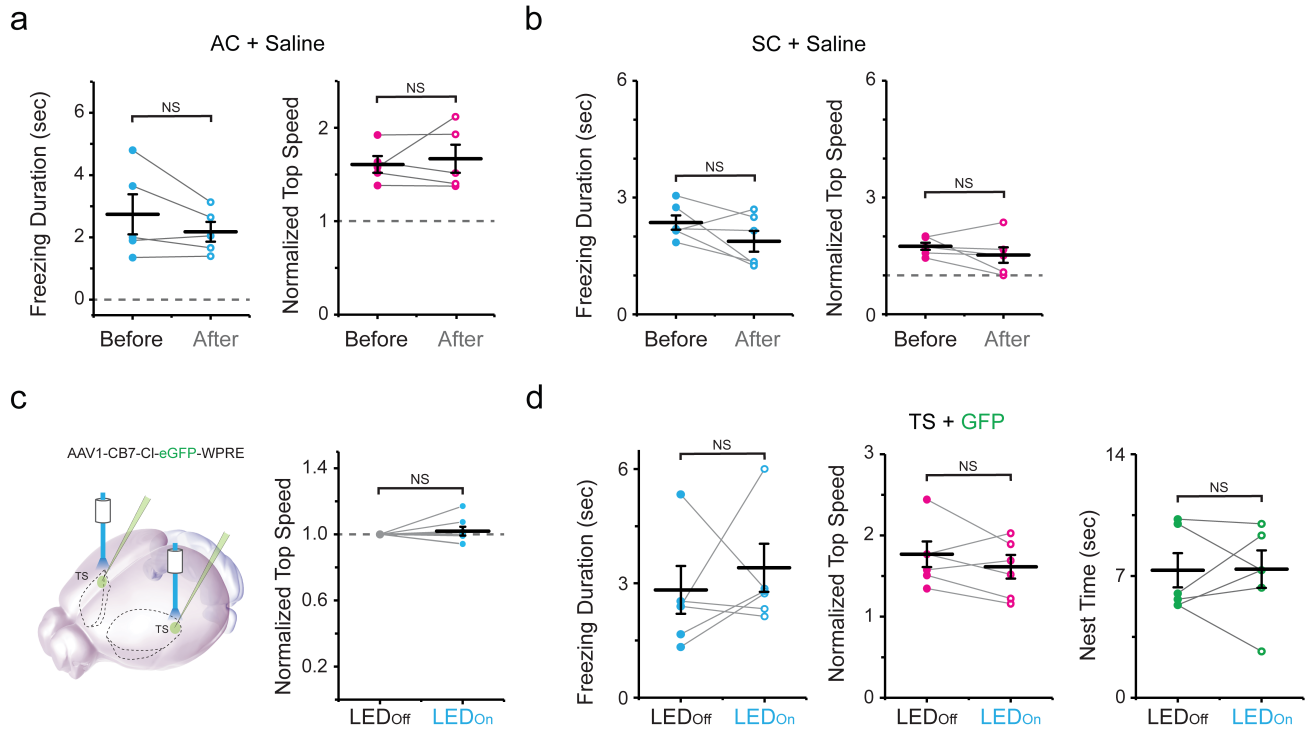

**Supplementary Fig. 4. Control groups for AC, SC and TS manipulations.** **a**, Quantitation of crescendo-induced freezing duration (left,  $p = 0.09$ , two-sided paired  $t$  test,  $t = 1.635$ ) and normalized top speed (right,  $p = 0.68$ , two-sided paired  $t$  test,  $t = -0.496$ ) before and after injection of saline in the auditory cortex (AC,  $n = 5$  mice). **b**, Crescendo-induced freezing duration (left,  $p = 0.07$ , two-sided paired  $t$  test,  $t = 1.720$ ) and normalized top speed (right,  $p = 0.13$ , two-sided paired  $t$  test,  $t = 1.264$ ) before and after injection of saline in the superior colliculus (SC,  $n = 6$  mice). **c**, No effect of LED stimulation on locomotion in mice with AAV-GFP injected in TS ( $p = 0.72$ , two-sided paired  $t$  test,  $t = -0.624$ ,  $n = 8$  mice). **d**, No effects of LED stimulation on crescendo-induced freezing duration (left,  $p = 0.73$ , two-sided paired  $t$  test,  $t = -0.642$ ), normalized top speed (right,  $p = 0.13$ , two-sided paired  $t$  test,  $t = 1.257$ ) or nest time (right,  $p = 0.52$ , two-sided paired  $t$  test,  $t = -0.069$ ) in mice with AAV-GFP injected in TS ( $n = 6$  mice). Data are presented as mean  $\pm$  s.e.m. for **a-d**. The center presents the mean value and the bar represents s.e.m.

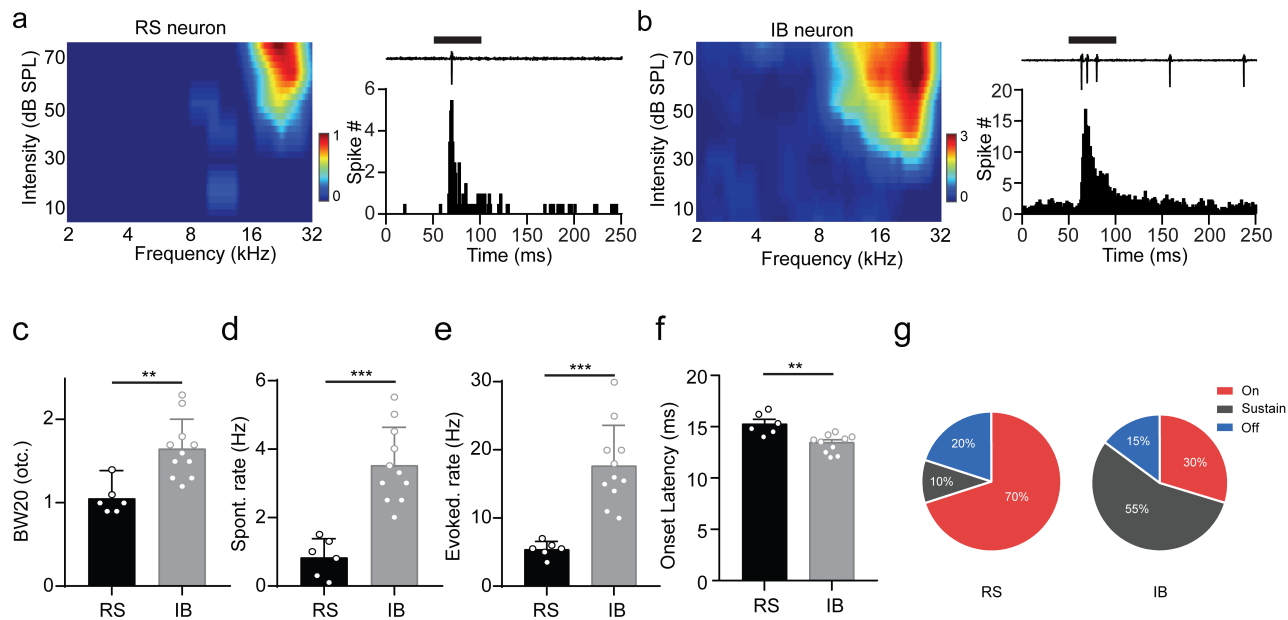

**Supplementary Fig. 5. Response properties of regular spiking (RS) and intrinsic bursting (IB) neurons in layer 5 of auditory cortex (AC).** **a**, Left, frequency-intensity tonal receptive field (TRF) of an example RS neuron. Color scale represents the number of spikes evoked. Right, peri-stimulus spike time histogram (PSTH) of the neuron's responses to best-frequency tones. Top inset, example recorded trace. Note that only one spike was evoked. **b**, An example IB neuron. Note that a train of spikes was evoked. **c-f**, Comparison of bandwidth of TRF at 20 dB above the intensity threshold (i.e. BW20, **c**), spontaneous firing rate (**d**), evoked firing rate (**e**) and onset latency (**f**) between RS ( $n = 6$ ) and IB ( $n = 11$ ) neurons. BW20: \*\* $p = 0.0017$ ,  $t = -3.81$ ; Spontaneous firing rate: \*\*\* $p = 5.718 \times 10^{-5}$ ,  $t = -5.535$ ; Evoked firing rate: \*\*\* $p = 1.680 \times 10^{-4}$ ,  $t = -4.969$ ; Onset latency: \*\* $p = 0.002$ ,  $t = -3.750$ , two-sided t test. **g**, Proportions of ON, OFF and sustained types in the RS and IB groups. Data are presented as mean + s.e.m in **c-f**. The vertical bar represents s.e.m.
